# Supplementary material
Source: publisher figshare collection journal article supplement (https://gsapubs.figshare.com/ndownloader/files/39511390)
Supplement: Supplementary file 1 [file 39511390]

Supplemental Material for

## **Phosphorus deficit of continental crust induced by recycling of apatite-bearing cumulates**

Ronghua Cai, Jingao Liu\*, Yao Sun, Ruohan Gao

State Key Laboratory of Geological Processes and Mineral Resources, China University of Geosciences, Beijing 100083, China

### **DATA SOURCE**

All geochemical data for igneous rocks from subduction zones used in this study were taken from Precompiled Files of Convergent Margins (DIGIS Team, 2021, "GEOROC Compilation: Convergent Margins", <https://doi.org/10.25625/PVFZCE>, GRO.data, V1) in the GEOROC database (<http://georoc.mpch-mainz.gwdg.de/georoc/>). The compiled data include nearly all active continental and island arcs (they do not display obvious differences in P/Nd). We filtered out sedimentary and metamorphic rocks and only retained Cenozoic samples to ensure they represent recent arc magmatism. The chemical compositions of minerals (amphibole, apatite, clinopyroxene, feldspar, garnet, mica, orthopyroxene, titanite, and zircon) were also taken from Precompiled Files in the GEOROC database (DIGIS Team, 2021, "GEOROC Compilation: Minerals", <https://doi.org/10.25625/SGFTFN>, GRO.data, V1). The chemical compositions of monazite were taken from Bea, (1996). We only retained the minerals from mafic to granitic igneous rocks and excluded those from peridotite xenoliths and carbonatites because they are not related with arc magmatism. These minerals are from all geological backgrounds and have different ages. The major element data of arc cumulates or arclogites were taken from the supplementary material in Chin et al. (2018), and Th/La data were compiled in this study. These cumulates are from continental arc (e.g., Sierra Nevada, Arizona, Andes) and island arc (e.g., Kohistan, Marianas, Sunda) and the details can be found in the literature (Lee et al., 2006; Erdman

et al., 2016; Chin et al., 2018). The data of glacial diamictite are taken from Gaschnig et al. (2014, 2016). The oceanic island basalts (OIB) and mid-ocean ridge basalts (MORB) data were respectively taken from Precompiled Files in the GEOROC and the supplementary material in Yang et al. (2021). The continental crust and primitive mantle values are from Rudnick and Gao (2013) and McDonough and Sun (1995) respectively. All data used in this study are available at Supplementary Excel tables and [https://figshare.com/articles/dataset/Phosphorus\\_depletion\\_of\\_continental\\_crust\\_induced\\_by\\_recycling\\_of\\_apatite-bearing\\_cumulates/20449146](https://figshare.com/articles/dataset/Phosphorus_depletion_of_continental_crust_induced_by_recycling_of_apatite-bearing_cumulates/20449146).

**Table S1 Th-La-Nd partition coefficients between apatite and silicate melts**

| D Th      | D La      | D Nd      | Ref               | Note                                                                     |
|-----------|-----------|-----------|-------------------|--------------------------------------------------------------------------|
|           | 14.5-28.2 | 32.8-61.2 | Fujimaki 1986 CMP | Melt composition is andesite to diorite                                  |
| 41        | 456       | 855       | Bea 1994 CG       | Mineral/leucosome trace-element partitioning in a peraluminous migmatite |
| 0.33-1.08 | 1.91-19.7 |           | Prowatke 2006 GCA | 1250°C; 1Gpa; melt composition is basalt to granite                      |
|           | 2.5-11.9  |           | Watson 1981 EPSL  | 950-1120°C; 7.5-20kbar; Melt composition is basanite to granite          |
|           | 4.8-6.7   | 7-7.9     | Fleet 1997 GCA    | 700-800°C; 0.1-0.15Gpa                                                   |
| 4-13      | 77-281    | 159-520   | Li 2017 CG        | 800°C; 2.5Gpa; apatite and sediment melt at subduction zone conditions   |

## Bibliography

- Bea, F., Pereira, M.D., and Stroh, A., 1994, Mineral/leucosome trace-element partitioning in a peraluminous migmatite (a laser ablation-ICP-MS study): *Chemical Geology*, v. 117, p. 291–312, doi:10.1016/0009-2541(94)90133-3.
- Bea, F., 1996, Residence of REE, Y, Th and U in granites and crustal protoliths; implications for the chemistry of crustal melts: *Journal of Petrology*, v. 37, p. 521–552, doi:10.1093/petrology/37.3.521.
- Chin, E.J., Shimizu, K., Bybee, G.M., and Erdman, M.E., 2018, On the development of the calc-alkaline and tholeiitic magma series: A deep crustal cumulate perspective: *Earth and Planetary Science Letters*, v. 482, p. 277–287, doi:10.1016/j.epsl.2017.11.016.
- Erdman, M.E., Lee, C.T.A., Levander, A., and Jiang, H., 2016, Role of arc magmatism and lower crustal foundering in controlling elevation history of the Nevadaplano and Colorado Plateau: A case study of pyroxenitic lower crust from central Arizona, USA: *Earth and Planetary Science Letters*, v. 439, p. 48–57, doi:10.1016/j.epsl.2016.01.032.
- Fleet, M.E., and Pan, Y., 1997, Rare earth elements in apatite: Uptake from H<sub>2</sub>O-bearing phosphate-fluoride melts and the role of volatile components: *Geochimica et Cosmochimica Acta*, v. 61, p. 4745–4760, doi:10.1016/S0016-7037(97)00292-5.
- Fujimaki, H., 1986, Partition coefficients of Hf, Zr, and REE between zircon, apatite, and liquid: *Contributions to Mineralogy and Petrology*, v. 94, p. 42–45, doi:10.1007/BF00371224.
- Gaschnig, R.M., Rudnick, R.L., McDonough, W.F., Kaufman, A.J., Hu, Z., and Gao, S., 2014, Onset of oxidative weathering of continents recorded in the geochemistry of ancient glacial diamictites: *Earth and Planetary Science Letters*, v. 408, p. 87–99, doi:10.1016/j.epsl.2014.10.002.
- Gaschnig, R.M., Rudnick, R.L., McDonough, W.F., Kaufman, A.J., Valley, J.W., Hu, Z., Gao, S., and Beck, M.L., 2016, Compositional evolution of the upper continental crust through time, as constrained by ancient glacial diamictites: *Geochimica et Cosmochimica Acta*, v. 186, p. 316–343, doi:10.1016/j.gca.2016.03.020.
- Li, H., and Hermann, J., 2017, The effect of fluorine and chlorine on trace element partitioning between apatite and sediment melt at subduction zone conditions: *Chemical Geology*, v. 473, p. 55–73, doi:10.1016/j.chemgeo.2017.10.016.

- Lee, C.T.A., Cheng, X., and Horodyskyj, U., 2006, The development and refinement of continental arcs by primary basaltic magmatism, garnet pyroxenite accumulation, basaltic recharge and delamination: Insights from the Sierra Nevada, California: *Contributions to Mineralogy and Petrology*, v. 151, p. 222–242, doi:10.1007/s00410-005-0056-1.
- McDonough, W.F., and Sun, S. s., 1995, The composition of the Earth: *Chemical Geology*, v. 120, p. 223–253, doi:10.1016/0009-2541(94)00140-4.
- Prowatke, S., and Klemme, S., 2006, Trace element partitioning between apatite and silicate melts: *Geochimica et Cosmochimica Acta*, v. 70, p. 4513–4527, doi:10.1016/j.gca.2006.06.162.
- Rudnick, R.L., and Gao, S., 2013, *Composition of the Continental Crust*: Elsevier Ltd., v. 4, 1–51 p., doi:10.1016/B978-0-08-095975-7.00301-6.
- Watson, E.B., and Green, T.H., 1981, Apatite/liquid partition coefficients for the rare earth elements and strontium: *Earth and Planetary Science Letters*, v. 56, p. 405–421, doi:10.1016/0012-821X(81)90144-8.
- Yang, A.Y., Langmuir, C.H., Cai, Y., Michael, P., Goldstein, S.L., and Chen, Z., 2021, A subduction influence on ocean ridge basalts outside the Pacific subduction shield: *Nature Communications*, v. 12, p. 1–10, doi:10.1038/s41467-021-25027-2.
